# Supplementary material
Source: Springer Nature journal article supplement (https://www.springermedizin.de/resource/supplementary/12936_2012_2484_MOESM1_ESM.pdf/9542868)

Shaded area  $A_T$

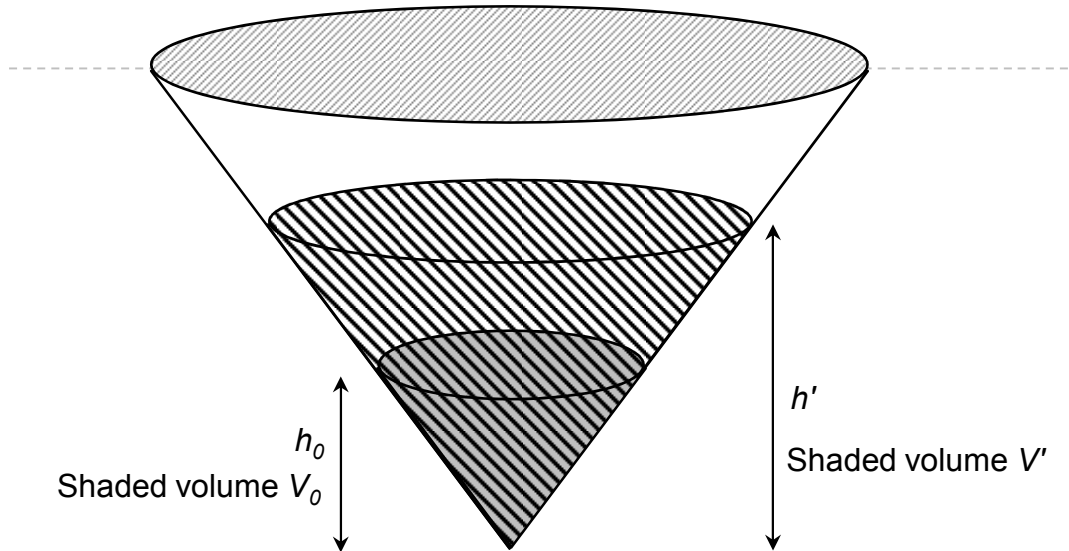

Supplement: MOESM1 [file 9542868]
